# Supplementary material
Source: PubMed Central journal article supplement (PMC4017280)
Supplement: mmc1.pdf [file mmc1.pdf]

# Differential Effects of RGK Proteins on L-Type Channel Function in Adult Mouse Skeletal Muscle

D. Beqollari,<sup>†</sup> C. F. Romberg,<sup>†</sup> U. Meza,<sup>†‡</sup> S. Papadopoulos,<sup>§</sup> and R. A. Bannister<sup>†\*</sup>

<sup>†</sup>Department of Medicine-Cardiology Division, University of Colorado Denver-Anschutz Medical Campus, Aurora, Colorado; <sup>‡</sup>Departamento de Fisiología y Biofísica, Facultad de Medicina, Universidad Autónoma de San Luis Potosí, San Luis Potosí, México; and <sup>§</sup>Institute of Vegetative Physiology, University Hospital of Cologne, Cologne, Germany

Supporting Material

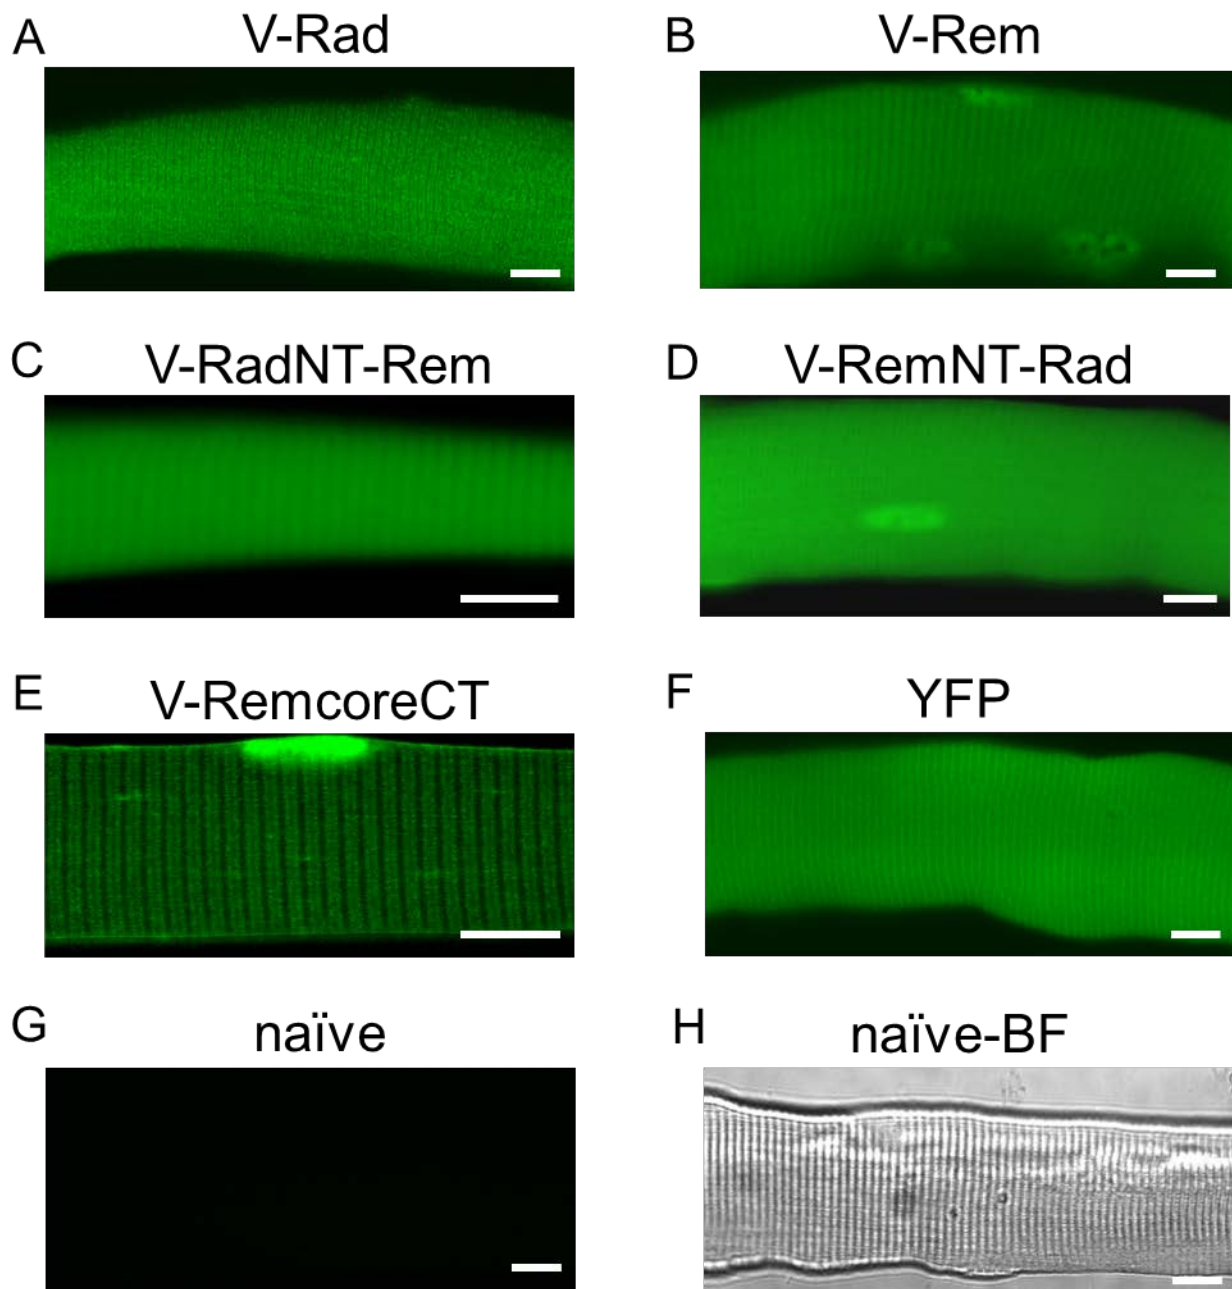

FIGURE S1 Exogenous expression of V-Rad and V-Rem constructs in FDB fibers transfected via *in vivo* electroporation. Confocal fluorescence images of live, intact FDB fibers overexpressing V-Rad, V-Rem, V-RadNT-Rem, V-RemNT-Rad and YFP are shown as labelled in panels (A-F). Fluorescence and brightfield images of a naïve fiber are shown in panels (G and H), respectively. The image in (G) was acquired with identical laser settings as the image in (A). FDB fibers were examined in Rodent Ringer's solution using an LSM 510 META confocal microscope (Zeiss, Thornwood, NY). Venus was excited with the 488-nm line of an argon laser (30-milliwatt maximum output, operated at 50% or 6.3A and attenuated to 5%) which was directed to the cell via a UV/488/543/633 nm quad dichroic mirror. The emitted Venus fluorescence was directed to a photomultiplier equipped with a 505-530 band pass filter. Bars-10  $\mu$ m.
